# Supplementary material
Source: publisher figshare collection journal article supplement (https://asha.figshare.com/articles/dataset/_/28719578)
Supplement: Supplementary file 1 [file 1]

**Supplemental Material S2.** Results of linear mixed-effect models for linguistic measures: Comprehensive Aphasia Test and Verb Naming Test.

|                                                      | Estimate | Std. Error | <i>df</i> | <i>t</i> value | <i>p</i> -value |
|------------------------------------------------------|----------|------------|-----------|----------------|-----------------|
| <b>CAT Naming Total Score</b>                        |          |            |           |                |                 |
| (Intercept)                                          | 35.05    | 6.48       | 109.86    | 5.41           | < .001          |
| Dyad                                                 | -10.03   | 6.05       | 113.47    | -1.66          | .10             |
| Large Group                                          | -7.61    | 6.05       | 113.47    | -1.26          | .21             |
| Posttreatment                                        | -1.02    | 1.31       | 203.50    | -0.78          | .44             |
| Maintenance                                          | -1.08    | 1.31       | 203.50    | -0.82          | .41             |
| Temple                                               | 20.85    | 6.47       | 107.01    | 3.22           | < .01           |
| Adler                                                | 23.55    | 6.70       | 107.01    | 3.52           | < .01           |
| Dyad × Posttreatment                                 | 4.26     | 1.81       | 203.35    | 2.36           | .02             |
| Group × Posttreatment                                | 6.37     | 1.87       | 203.82    | 3.41           | < .01           |
| Dyad × Maintenance                                   | 3.20     | 1.83       | 203.40    | 1.75           | .08             |
| Group × Maintenance                                  | 4.27     | 1.87       | 203.81    | 2.29           | .02             |
| <b>CAT Repetition Total Score</b>                    |          |            |           |                |                 |
| (Intercept)                                          | 37.20    | 4.89       | 110.83    | 7.61           | < .001          |
| Dyad                                                 | -9.01    | 4.57       | 115.63    | -1.97          | .05             |
| Large Group                                          | -3.28    | 4.57       | 115.63    | -0.72          | .48             |
| Posttreatment                                        | -0.49    | 1.14       | 203.67    | -0.43          | .67             |
| Maintenance                                          | 0.79     | 1.14       | 203.67    | 0.70           | .49             |
| Temple                                               | 17.26    | 4.87       | 107.02    | 3.54           | < .01           |
| Adler                                                | 15.78    | 5.04       | 107.03    | 3.13           | < .01           |
| Dyad × Posttreatment                                 | 5.02     | 1.57       | 203.47    | 3.20           | < .01           |
| Group × Posttreatment                                | 2.12     | 1.62       | 204.09    | 1.31           | .19             |
| Dyad × Maintenance                                   | 3.12     | 1.58       | 203.54    | 1.97           | .05             |
| Group × Maintenance                                  | 0.10     | 1.62       | 204.08    | 0.06           | .95             |
| <b>CAT Spoken Language Comprehension Total Score</b> |          |            |           |                |                 |
| (Intercept)                                          | 41.09    | 3.02       | 114.26    | 13.60          | < .001          |
| Dyad                                                 | -3.60    | 2.85       | 123.65    | -1.26          | .21             |
| Large Group                                          | -0.79    | 2.85       | 123.65    | -0.28          | .78             |
| Posttreatment                                        | 2.57     | 0.97       | 204.07    | 2.65           | .01             |
| Maintenance                                          | 1.28     | 0.97       | 204.07    | 1.32           | .19             |
| Temple                                               | 7.15     | 2.98       | 106.86    | 2.39           | .02             |
| Adler                                                | 8.23     | 3.09       | 106.87    | 2.67           | .01             |
| Dyad × Posttreatment                                 | -1.10    | 1.34       | 203.71    | -0.82          | .41             |
| Group × Posttreatment                                | -0.98    | 1.38       | 204.84    | -0.71          | .48             |
| Dyad × Maintenance                                   | -1.61    | 1.35       | 203.85    | -1.19          | .23             |

|                                                  |       |      |        |       |        |
|--------------------------------------------------|-------|------|--------|-------|--------|
| Group × Maintenance                              | 0.84  | 1.38 | 204.82 | 0.61  | .54    |
| <b>CAT Reading Comprehension Total Score</b>     |       |      |        |       |        |
| (Intercept)                                      | 35.79 | 3.22 | 119.41 | 11.12 | < .001 |
| Dyad                                             | -3.83 | 3.08 | 135.12 | -1.25 | .22    |
| Large Group                                      | -0.23 | 3.08 | 135.12 | -0.07 | .94    |
| Posttreatment                                    | -1.37 | 1.32 | 204.98 | -1.04 | .30    |
| Maintenance                                      | -0.91 | 1.32 | 204.98 | -0.70 | .49    |
| Temple                                           | 8.24  | 3.15 | 107.08 | 2.62  | .01    |
| Adler                                            | 10.47 | 3.25 | 107.09 | 3.22  | .00    |
| Dyad × Posttreatment                             | 1.61  | 1.82 | 204.42 | 0.89  | .38    |
| Group × Posttreatment                            | 0.37  | 1.87 | 206.15 | 0.20  | .84    |
| Dyad × Maintenance                               | 0.54  | 1.83 | 204.65 | 0.29  | .77    |
| Group × Maintenance                              | 2.70  | 1.87 | 206.13 | 1.45  | .15    |
| <b>CAT Oral Reading Total Score</b>              |       |      |        |       |        |
| (Intercept)                                      | 28.99 | 5.64 | 108.67 | 5.14  | < .001 |
| Dyad                                             | -7.92 | 5.25 | 110.79 | -1.51 | .13    |
| Large Group                                      | -1.89 | 5.25 | 110.79 | -0.36 | .72    |
| Posttreatment                                    | 0.32  | 0.90 | 199.38 | 0.36  | .72    |
| Maintenance                                      | 0.02  | 0.88 | 199.31 | 0.02  | .98    |
| Temple                                           | 19.19 | 5.65 | 106.98 | 3.40  | .00    |
| Adler                                            | 17.10 | 5.85 | 107.02 | 2.92  | .00    |
| Dyad × Posttreatment                             | 0.68  | 1.23 | 199.26 | 0.55  | .58    |
| Group × Posttreatment                            | 0.97  | 1.28 | 199.56 | 0.75  | .45    |
| Dyad × Maintenance                               | 2.10  | 1.22 | 199.25 | 1.72  | .09    |
| Group × Maintenance                              | 0.72  | 1.25 | 199.50 | 0.57  | .57    |
| <b>CAT Picture Description Narrative Scoring</b> |       |      |        |       |        |
| (Intercept)                                      | 8.07  | 3.45 | 117.61 | 2.34  | .02    |
| Dyad                                             | -2.92 | 3.29 | 132.24 | -0.89 | .38    |
| Large Group                                      | -4.69 | 3.31 | 132.25 | -1.42 | .16    |
| Posttreatment                                    | 0.92  | 1.38 | 204.06 | 0.66  | .51    |
| Maintenance                                      | 1.85  | 1.37 | 203.81 | 1.36  | .18    |
| Temple                                           | 12.37 | 3.37 | 106.21 | 3.67  | < .001 |
| Adler                                            | 15.44 | 3.51 | 106.00 | 4.40  | < .001 |
| Dyad × Posttreatment                             | 0.72  | 1.90 | 203.42 | 0.38  | .71    |
| Group × Posttreatment                            | 1.86  | 1.96 | 204.68 | 0.95  | .34    |
| Dyad × Maintenance                               | -1.53 | 1.90 | 203.50 | -0.81 | .42    |
| Group × Maintenance                              | 3.36  | 1.95 | 204.56 | 1.73  | .09    |
| <b>Verb Naming Test Number Correct</b>           |       |      |        |       |        |
| (Intercept)                                      | 8.90  | 1.68 | 112.38 | 5.31  | < .001 |

|                       |       |      |        |       |     |
|-----------------------|-------|------|--------|-------|-----|
| Dyad                  | -3.20 | 1.58 | 120.98 | -2.03 | .04 |
| Large Group           | -0.56 | 1.59 | 120.58 | -0.35 | .72 |
| Posttreatment         | 0.19  | 0.51 | 202.01 | 0.38  | .70 |
| Maintenance           | -0.15 | 0.51 | 202.01 | -0.30 | .77 |
| Temple                | 6.46  | 1.66 | 105.94 | 3.90  | .00 |
| Adler                 | 7.61  | 1.72 | 105.95 | 4.41  | .00 |
| Dyad × Posttreatment  | 1.21  | 0.70 | 201.75 | 1.73  | .09 |
| Group × Posttreatment | 0.37  | 0.73 | 202.72 | 0.52  | .61 |
| Dyad × Maintenance    | 0.86  | 0.71 | 201.88 | 1.21  | .23 |
| Group × Maintenance   | 0.88  | 0.72 | 202.65 | 1.22  | .22 |

*Note.* In all omnibus analyses, the reference factors are (1) Control condition (2) Pretreatment and (3) Boston University. "Group" refers to the large group condition.
