# Supplementary material
Source: publisher figshare collection journal article supplement (https://asha.figshare.com/articles/dataset/_/28719578)
Supplement: Supplementary file 2 [file 1]

**Supplemental Material S12.** Results of linear mixed-effect models for mean number of core lexicon words.

|                       | Estimate | Std. Error | <i>df</i> | <i>t</i> value | <i>p</i> -value |
|-----------------------|----------|------------|-----------|----------------|-----------------|
| (Intercept)           | 8.36     | 1.97       | 40.78     | 4.24           | < .0001         |
| Condition-Control     | 2.17     | 2.06       | 42.42     | 1.05           | .30             |
| Time-Posttreatment    | 0.12     | 0.51       | 82.00     | 0.24           | .81             |
| Time-Maintenance      | -0.25    | 0.51       | 82.00     | -0.49          | .63             |
| Site-Temple           | 7.57     | 2.38       | 39.00     | 3.18           | < .01           |
| Site-Adler            | 4.54     | 2.56       | 39.00     | 1.77           | .08             |
| Control × Post-Tx     | -0.42    | 0.73       | 82.00     | -0.58          | .56             |
| Control × Maintenance | -0.19    | 0.73       | 82.00     | -0.27          | .79             |

*Note.* In these post-hoc (secondary) analyses, the reference factors are (1) Dyad Condition (2) Pretreatment and (3) Boston University. "Condition" refers to the dyad condition and "Post-Tx" refers to posttreatment.
