# Supplementary material
Source: publisher figshare collection journal article supplement (https://asha.figshare.com/articles/dataset/_/28719578)
Supplement: Supplementary file 3 [file 1]

**Supplemental Material S6.** Results of linear mixed-effect models for linguistic measures: Comprehensive Aphasia Test and Verb Naming Test.

|                                                  | Estimate | Std. Error | <i>df</i> | <i>t</i> value | <i>p</i> -value |
|--------------------------------------------------|----------|------------|-----------|----------------|-----------------|
| <b>CAT Naming Total Score</b>                    |          |            |           |                |                 |
| (Intercept)                                      | 30.37    | 7.13       | 71.57     | 4.26           | < .0001         |
| Condition-Control                                | 6.94     | 6.01       | 74.95     | 1.16           | .25             |
| Time-Posttreatment                               | 5.26     | 1.43       | 131.9     | 3.67           | < .001          |
| Time-Maintenance                                 | 2.64     | 1.43       | 131.89    | 1.84           | .07             |
| Site-Temple                                      | 17.90    | 7.89       | 70.0      | 2.27           | < .01           |
| Site-Adler                                       | 18.96    | 8.21       | 70.0      | 2.31           | .02             |
| Control × Post-Tx                                | -5.61    | 2.01       | 131.66    | -2.79          | < .01           |
| Control × Maintenance                            | -3.45    | 2.01       | 131.66    | -1.71          | .09             |
| <b>CAT Repetition Total Score</b>                |          |            |           |                |                 |
| (Intercept)                                      | 34.70    | 5.38       | 71.39     | 6.46           | < .0001         |
| Condition-Control                                | 3.29     | 4.51       | 74.29     | 0.73           | .47             |
| Time-Posttreatment                               | 1.59     | 1.00       | 131.8     | 1.58           | .12             |
| Time-Maintenance                                 | 1.01     | 1.00       | 131.8     | 1.01           | .32             |
| Site-Temple                                      | 15.73    | 5.95       | 70.0      | 2.64           | .01             |
| Site-Adler                                       | 15.56    | 6.19       | 70.0      | 2.51           | .01             |
| Control × Post-Tx                                | -1.67    | 1.41       | 131.61    | -1.19          | .24             |
| Control × Maintenance                            | -0.21    | 1.41       | 131.61    | -0.15          | .88             |
| <b>CAT Picture Description Narrative Scoring</b> |          |            |           |                |                 |
| (Intercept)                                      | 4.91     | 3.64       | 73.64     | 1.34           | .18             |
| Condition-Control                                | 4.47     | 3.14       | 83.15     | 1.42           | .16             |
| Time-Posttreatment                               | 2.58     | 1.22       | 131.93    | 2.12           | .04             |
| Time-Maintenance                                 | 5.52     | 1.22       | 131.91    | 4.28           | < .001          |
| Site-Temple                                      | 11.48    | 3.99       | 69.13     | 2.89           | < .01           |
| Site-Adler                                       | 12.19    | 4.18       | 68.94     | 2.92           | < .01           |
| Control × Post-Tx                                | -1.46    | 1.72       | 131.6     | -0.85          | .40             |
| Control × Maintenance                            | -3.15    | 1.71       | 131.5     | -1.84          | .07             |
| <b>Verb Naming Test Number Correct</b>           |          |            |           |                |                 |
| (Intercept)                                      | 8.38     | 1.75       | 71.81     | 4.80           | < .0001         |
| Condition-Control                                | 0.56     | 1.49       | 77.80     | 0.37           | .71             |
| Time-Posttreatment                               | 0.57     | 0.48       | 131.5     | 1.20           | .23             |
| Time-Maintenance                                 | 0.73     | 0.47       | 131.41    | 1.56           | .12             |
| Site-Temple                                      | 6.44     | 1.92       | 68.92     | 3.35           | .001            |
| Site-Adler                                       | 7.53     | 2.01       | 68.91     | 3.74           | < .001          |
| Control × Post-Tx                                | -0.37    | 0.66       | 131.08    | -0.56          | .56             |

|                       |       |      |        |       |     |
|-----------------------|-------|------|--------|-------|-----|
| Control × Maintenance | -0.59 | 0.66 | 131.03 | -.090 | .37 |
|-----------------------|-------|------|--------|-------|-----|

*Note.* In these post-hoc (secondary) analyses, the reference factors are (1) Large Group Condition (2) Pretreatment and (3) Boston University. "Group" refers to the large group condition and "Post-Tx" refers to posttreatment.
