# Supplementary material
Source: publisher figshare collection journal article supplement (https://asha.figshare.com/articles/dataset/_/28719578)
Supplement: Supplementary file 4 [file 1]

**Supplemental Material S5.** Results of linear mixed-effect models for functional and patient-reported outcome measures.

|                                                   | Estimate | Std. Error | <i>df</i> | <i>t</i> value | <i>p</i> -value |
|---------------------------------------------------|----------|------------|-----------|----------------|-----------------|
| <b>Aphasia Communication Outcome Measure</b>      |          |            |           |                |                 |
| (Intercept)                                       | 49.05    | 2.41       | 78.75     | 20.36          | < .0001         |
| Condition-Control                                 | 4.47     | 2.14       | 97.80     | 2.09           | .04             |
| Time-Posttreatment                                | 3.56     | 1.11       | 133.8     | 3.20           | < .01           |
| Time-Maintenance                                  | 4.75     | 1.12       | 133.8     | 4.26           | < .0001         |
| Site-Temple                                       | 0.53     | 2.59       | 69.63     | 0.20           | .84             |
| Site-Adler                                        | -0.89    | 2.72       | 69.31     | -0.33          | .75             |
| Control × Post-Tx                                 | -3.34    | 1.58       | 133.24    | -2.16          | .03             |
| Control × Maintenance                             | -2.46    | 1.57       | 133.11    | -1.57          | .12             |
| <b>Communication Activities of Daily Living-3</b> |          |            |           |                |                 |
| (Intercept)                                       | 74.90    | 4.26       | 41.29     | 17.60          | < .0001         |
| Condition-Control                                 | 4.19     | 4.46       | 43.42     | 0.94           | .35             |
| Time-Posttreatment                                | 2.04     | 1.27       | 81.04     | 1.61           | .11             |
| Time-Maintenance                                  | 3.91     | 1.25       | 80.97     | 3.13           | < .01           |
| Site-Temple                                       | 8.14     | 5.11       | 38.98     | 1.59           | .12             |
| Site-Adler                                        | 6.56     | 5.51       | 38.97     | 1.18           | .24             |
| Control × Post-Tx                                 | -3.23    | 1.81       | 81.00     | -1.79          | .08             |
| Control × Maintenance                             | -2.72    | 1.79       | 80.97     | -1.52          | .13             |
| <b>MOS Social Support Scale Total Score</b>       |          |            |           |                |                 |
| (Intercept)                                       | 3.69     | 0.24       | 49.49     | 15.37          | < .0001         |
| Condition-Control                                 | 0.18     | 0.26       | 59.08     | 0.67           | .50             |
| Time-Posttreatment                                | -0.02    | 0.14       | 81.3      | -0.14          | .89             |
| Time-Maintenance                                  | 0.18     | 0.14       | 81.0      | 1.27           | .21             |
| Site-Temple                                       | -0.16    | 0.28       | 39.09     | -0.60          | .55             |
| Site-Adler                                        | -0.13    | 0.30       | 39.06     | -0.43          | .67             |
| Control × Post-Tx                                 | 0.09     | 0.20       | 81.20     | 0.45           | .65             |
| Control × Maintenance                             | -0.02    | 0.20       | 81.04     | -0.10          | .92             |

*Note.* In these post-hoc (secondary) analyses, the reference factors are (1) Large Group Condition (2) Pretreatment and (3) Boston University. "Group" refers to the large group condition and "Post-Tx" refers to posttreatment.
