# Supplementary material
Source: publisher figshare collection journal article supplement (https://asha.figshare.com/articles/dataset/_/28719578)
Supplement: Supplementary file 5 [file 1]

**Supplemental Material S4.** Results of linear mixed-effect models for mean number of core lexicon words.

|                       | Estimate | Std. Error | <i>df</i> | <i>t</i> value | <i>p</i> -value |
|-----------------------|----------|------------|-----------|----------------|-----------------|
| (Intercept)           | 10.78    | 1.84       | 62.95     | 5.87           | .00             |
| Dyad                  | -2.18    | 2.03       | 64.83     | -1.07          | .29             |
| Large Group           | -1.29    | 2.03       | 64.83     | -0.64          | .53             |
| Posttreatment         | -0.44    | 0.49       | 122.98    | -0.90          | .37             |
| Maintenance           | -0.30    | 0.49       | 122.98    | -0.61          | .54             |
| BU                    | 6.64     | 1.90       | 59.99     | 3.49           | .00             |
| Temple                | 4.91     | 2.05       | 59.99     | 2.39           | .02             |
| Dyad × Posttreatment  | 0.19     | 0.69       | 122.98    | 0.28           | .78             |
| Group × Posttreatment | 0.34     | 0.70       | 123.02    | 0.49           | .63             |
| Dyad × Maintenance    | 0.42     | 0.69       | 122.98    | 0.61           | .54             |
| Group × Maintenance   | 1.32     | 0.69       | 122.98    | 1.91           | .06             |

*Note.* In all omnibus analyses, the reference factors are (1) Control condition (2) Pretreatment and (3) Boston University. "Group" refers to the large group condition.
