# Supplementary material
Source: publisher figshare collection journal article supplement (https://asha.figshare.com/articles/dataset/_/28719578)
Supplement: Supplementary file 6 [file 1]

**Supplemental Material S11.** Results of linear mixed-effect models for complete utterances.

|                                      | Estimate | Std. Error | <i>df</i> | <i>t</i> value | <i>p</i> -value |
|--------------------------------------|----------|------------|-----------|----------------|-----------------|
| <b>Number of Utterances</b>          |          |            |           |                |                 |
| (Intercept)                          | 8.52     | 0.88       | 47.08     | 9.68           | < .001          |
| Condition-Control                    | 0.14     | 0.87       | 57.30     | 0.16           | .87             |
| Time-Posttreatment                   | 0.06     | 0.46       | 82.00     | 0.13           | .90             |
| Time-Maintenance                     | -0.12    | 0.46       | 82.00     | -0.27          | .79             |
| Site-Temple                          | -0.32    | 0.98       | 39.00     | -0.32          | .75             |
| Site-Adler                           | -1.65    | 1.00       | 39.00     | -1.66          | .11             |
| Control × Post-Tx                    | 0.19     | 0.65       | 82.00     | 0.30           | .76             |
| Control × Maintenance                | 0.14     | 0.65       | 82.00     | 0.21           | .83             |
| <b>Number of Complete Utterances</b> |          |            |           |                |                 |
| (Intercept)                          | 4.90     | 1.00       | 41.05     | 4.90           | < .001          |
| Condition-Control                    | -0.63    | 0.95       | 43.61     | -0.67          | .51             |
| Time-Posttreatment                   | 0.07     | 0.28       | 82.00     | 0.26           | .80             |
| Time-Maintenance                     | -0.42    | 0.28       | 82.00     | -1.52          | .13             |
| Site-Temple                          | 0.63     | 1.16       | 39.00     | 0.54           | .59             |
| Site-Adler                           | -2.76    | 1.17       | 39.00     | -2.36          | .02             |
| Control × Post-Tx                    | 0.08     | 0.39       | 82.00     | 0.22           | .83             |
| Control × Maintenance                | 0.61     | 0.39       | 82.00     | 1.58           | .12             |
| <b>Percent Complete Utterances</b>   |          |            |           |                |                 |
| (Intercept)                          | 56.59    | 10.57      | 39.96     | 5.35           | < .001          |
| Condition-Control                    | -13.49   | 9.96       | 41.15     | -1.35          | .18             |
| Time-Posttreatment                   | -1.48    | 2.01       | 82.00     | -0.74          | .46             |
| Time-Maintenance                     | -4.46    | 2.01       | 82.00     | -2.22          | .03             |
| Site-Temple                          | 14.74    | 12.29      | 39.00     | 1.20           | .24             |
| Site-Adler                           | -24.22   | 12.47      | 39.00     | -1.94          | .06             |
| Control × Post-Tx                    | -1.25    | 2.81       | 82.00     | -0.45          | .66             |
| Control × Maintenance                | 5.69     | 2.81       | 82.0      | 2.02           | .05             |

*Note.* In these post-hoc (secondary) analyses, the reference factors are (1) Dyad Condition (2) Pretreatment and (3) Boston University. "Condition" refers to the dyad condition and "Post-Tx" refers to posttreatment.
