# Supplementary material
Source: publisher figshare collection journal article supplement (https://asha.figshare.com/articles/dataset/_/28719578)
Supplement: Supplementary file 7 [file 1]

**Supplemental Material S9.** Results of linear mixed-effect models for functional and patient-reported outcome measures.

|                                                   | Estimate | Std. Error | <i>df</i> | <i>t</i> value | <i>p</i> -value |
|---------------------------------------------------|----------|------------|-----------|----------------|-----------------|
| <b>Aphasia Communication Outcome Measure</b>      |          |            |           |                |                 |
| (Intercept)                                       | 50.91    | 2.46       | 85.51     | 20.73          | < .0001         |
| Condition-Control                                 | 2.23     | 2.24       | 117.66    | 0.99           | .32             |
| Time-Posttreatment                                | 1.58     | 1.34       | 138.81    | 1.18           | .24             |
| Time-Maintenance                                  | 2.58     | 1.36       | 139.58    | 1.89           | .06             |
| Site-Temple                                       | 0.22     | 2.60       | 70.24     | 0.09           | .93             |
| Site-Adler                                        | 0.67     | 2.70       | 69.86     | 0.25           | .81             |
| Control × Post-Tx                                 | -1.39    | 1.95       | 139.85    | -0.71          | .48             |
| Control × Maintenance                             | -0.28    | 1.96       | 139.99    | -0.14          | .89             |
| <b>Communication Activities of Daily Living-3</b> |          |            |           |                |                 |
| (Intercept)                                       | 64.03    | 4.29       | 41.54     | 14.93          | < .0001         |
| Condition-Control                                 | 7.29     | 4.50       | 43.88     | 1.62           | .11             |
| Time-Posttreatment                                | 2.09     | 1.31       | 82.0      | 1.59           | .12             |
| Time-Maintenance                                  | 3.14     | 1.31       | 82.0      | 2.39           | .02             |
| Site-Temple                                       | 17.59    | 5.15       | 39.0      | 3.42           | .001            |
| Site-Adler                                        | 21.13    | 5.54       | 39.0      | 3.81           | < .001          |
| Control × Post-Tx                                 | -3.28    | 1.88       | 82.0      | -1.75          | .08             |
| Control × Maintenance                             | -1.95    | 1.88       | 82.0      | -1.04          | .30             |
| <b>MOS Social Support Scale Total Score</b>       |          |            |           |                |                 |
| (Intercept)                                       | 4.06     | 0.20       | 55.01     | 20.58          | < 2e-16         |
| Condition-Control                                 | -0.18    | 0.22       | 69.72     | -0.84          | .41             |
| Time-Posttreatment                                | 0.05     | 0.14       | 81.23     | 0.38           | .70             |
| Time-Maintenance                                  | 0.22     | 0.14       | 80.79     | 1.58           | .12             |
| Site-Temple                                       | -0.42    | 0.22       | 38.83     | -1.93          | .06             |
| Site-Adler                                        | 0.18     | 0.24       | 38.62     | 0.74           | .46             |
| Control × Post-Tx                                 | 0.02     | 0.20       | 81.01     | 0.09           | .93             |
| Control × Maintenance                             | -0.06    | 0.20       | 80.79     | -0.31          | .76             |

*Note.* In these post-hoc (secondary) analyses, the reference factors are (1) Dyad Condition (2) Pretreatment and (3) Boston University. "Condition" refers to the dyad condition and "Post-Tx" refers to posttreatment.
