# Supplementary material
Source: publisher figshare collection journal article supplement (https://asha.figshare.com/articles/dataset/_/28719578)
Supplement: Supplementary file 8 [file 1]

**Supplemental Material S7.** Results of linear mixed-effect models for complete utterances.

|                                      | Estimate | Std. Error | <i>df</i> | <i>t</i> value | <i>p</i> -value |
|--------------------------------------|----------|------------|-----------|----------------|-----------------|
| <b>Number of Utterances</b>          |          |            |           |                |                 |
| (Intercept)                          | 10.37    | 1.24       | 43.75     | 8.34           | < .0001         |
| Condition-Control                    | -1.28    | 1.19       | 48.86     | -1.08          | .29             |
| Time-Posttreatment                   | -0.24    | 0.46       | 83.16     | -0.52          | .60             |
| Time-Maintenance                     | -0.05    | 0.45       | 83.02     | -0.10          | .9              |
| Site-Temple                          | -0.92    | 1.43       | 39.97     | -.64           | .52             |
| Site-Adler                           | -2.26    | 1.43       | 40.03     | -1.59          | .120            |
| Control × Post-Tx                    | 0.49     | 0.65       | 83.10     | 0.76           | .45             |
| Control × Maintenance                | 0.06     | 0.64       | 83.02     | 0.09           | .93             |
| <b>Number of Complete Utterances</b> |          |            |           |                |                 |
| (Intercept)                          | 4.63     | 1.26       | 40.91     | 3.68           | < .001          |
| Condition-Control                    | 0.02     | 1.18       | 42.12     | 0.02           | .99             |
| Time-Posttreatment                   | -0.01    | 0.23       | 83.04     | -0.05          | .96             |
| Time-Maintenance                     | 0.55     | 0.23       | 83.01     | 2.36           | .02             |
| Site-Temple                          | -0.28    | 1.47       | 40.0      | -0.19          | .85             |
| Site-Adler                           | -2.91    | 1.47       | 40.01     | -1.98          | .05             |
| Control × Post-Tx                    | 0.17     | 0.33       | 83.03     | 0.50           | .62             |
| Control × Maintenance                | -0.35    | 0.33       | 83.00     | -1.09          | .28             |
| <b>Percent Complete Utterances</b>   |          |            |           |                |                 |
| (Intercept)                          | 41.64    | 9.96       | 41.24     | 4.18           | < .0001         |
| Condition-Control                    | 2.90     | 9.31       | 42.91     | 0.31           | .76             |
| Time-Posttreatment                   | -0.05    | 2.17       | 83.06     | -0.02          | .98             |
| Time-Maintenance                     | 2.45     | 2.13       | 83.01     | 1.15           | .25             |
| Site-Temple                          | 12.51    | 11.59      | 40.0      | 1.08           | .29             |
| Site-Adler                           | -25.95   | 11.59      | 40.0      | -2.24          | .03             |
| Control × Post-Tx                    | -2.69    | 3.04       | 83.03     | -0.89          | .38             |
| Control × Maintenance                | -1.22    | 3.01       | 83.01     | -0.41          | .69             |

*Note.* In these post-hoc (secondary) analyses, the reference factors are (1) Large Group Condition (2) Pretreatment and (3) Boston University. "Group" refers to the large group condition and "Post-Tx" refers to posttreatment.
