# Supplementary material
Source: publisher figshare collection journal article supplement (https://asha.figshare.com/articles/dataset/_/28719578)
Supplement: Supplementary file 9 [file 1]

**Supplemental Material S8.** Results of linear mixed-effect models for mean number of core lexicon words.

|                       | Estimate | Std. Error | <i>df</i> | <i>t</i> value | <i>p</i> -value |
|-----------------------|----------|------------|-----------|----------------|-----------------|
| (Intercept)           | 10.60    | 1.87       | 41.00     | 5.68           | < .0001         |
| Condition-Control     | 1.35     | 1.96       | 42.87     | 0.69           | .49             |
| Time-Posttreatment    | -0.10    | 0.52       | 81.02     | -0.20          | .85             |
| Time-Maintenance      | 1.02     | 0.52       | 80.96     | 1.97           | .05             |
| Site-Temple           | 5.66     | 3.91       | 39.01     | 1.45           | .16             |
| Site-Boston           | 5.33     | 3.63       | 39.02     | 1.47           | .15             |
| Control × Post-Tx     | 0.24     | 1.45       | 81.05     | 0.17           | .87             |
| Control × Maintenance | 0.57     | 1.44       | 81.01     | 0.40           | .69             |

*Note.* In these post-hoc (secondary) analyses, the reference factors are (1) Large Group Condition (2) Pretreatment and (3) Boston University. "Group" refers to the large group condition and "Post-Tx" refers to posttreatment.
