# Supplementary material
Source: publisher figshare collection journal article supplement (https://asha.figshare.com/articles/dataset/_/28719578)
Supplement: Supplementary file 10 [file 1]

**Supplemental Material S3.** Results of linear mixed-effect models for complete utterances.

|                                               | Estimate | Std. Error | <i>df</i> | <i>t</i> value | <i>p</i> -value |
|-----------------------------------------------|----------|------------|-----------|----------------|-----------------|
| <b>Number of Utterances</b>                   |          |            |           |                |                 |
| (Intercept)                                   | 8.98     | 0.94       | 78.73     | 9.60           | < .001          |
| Dyad                                          | -0.42    | 1.03       | 85.29     | -0.41          | .68             |
| Large Group                                   | 1.54     | 1.02       | 84.87     | 1.52           | .13             |
| Posttreatment                                 | 0.25     | 0.47       | 122.84    | 0.53           | .59             |
| Maintenance                                   | 0.01     | 0.47       | 122.84    | 0.03           | .98             |
| Temple                                        | -1.07    | 0.86       | 87.58     | -1.25          | .22             |
| Adler                                         | -1.77    | 0.97       | 65.70     | -1.83          | .07             |
| Dyad × Posttreatment                          | -0.19    | 0.68       | 122.84    | -0.29          | .78             |
| Group × Posttreatment                         | -0.49    | 0.68       | 123.00    | -0.72          | .47             |
| Dyad × Maintenance                            | -0.14    | 0.68       | 122.84    | -0.20          | .84             |
| Group × Maintenance                           | -0.06    | 0.67       | 122.84    | -0.09          | .93             |
| <b>Number of Grammatical (SV) Utterances</b>  |          |            |           |                |                 |
| (Intercept)                                   | 6.70     | 1.16       | 72.41     | 5.79           | < .001          |
| Dyad                                          | 0.49     | 1.26       | 74.75     | 0.39           | .70             |
| Large Group                                   | 1.48     | 1.25       | 74.43     | 1.19           | .24             |
| Posttreatment                                 | 0.28     | 0.44       | 123.17    | 0.64           | .52             |
| Maintenance                                   | 0.12     | 0.44       | 123.17    | 0.26           | .79             |
| Temple                                        | -0.16    | 1.04       | 85.92     | -0.15          | .88             |
| Adler                                         | -2.49    | 1.22       | 65.28     | -2.03          | .05             |
| Dyad × Posttreatment                          | -0.54    | 0.63       | 123.17    | -0.86          | .39             |
| Group × Posttreatment                         | -0.52    | 0.62       | 123.25    | -0.84          | .40             |
| Dyad × Maintenance                            | -0.66    | 0.63       | 123.17    | -1.05          | .30             |
| Group × Maintenance                           | 0.18     | 0.62       | 123.17    | 0.28           | .78             |
| <b>Percent of Grammatical (SV) Utterances</b> |          |            |           |                |                 |
| (Intercept)                                   | 64.77    | 8.19       | 69.88     | 7.91           | < .001          |
| Dyad                                          | 16.03    | 8.91       | 71.19     | 1.80           | .08             |
| Large Group                                   | 7.13     | 8.82       | 70.92     | 0.81           | .42             |
| Posttreatment                                 | -0.16    | 2.65       | 123.29    | -0.06          | .95             |
| Maintenance                                   | 0.31     | 2.65       | 123.29    | 0.12           | .91             |
| Temple                                        | 12.53    | 7.24       | 82.81     | 1.73           | .09             |
| Adler                                         | -14.73   | 8.73       | 64.68     | -1.69          | .10             |
| Dyad × Posttreatment                          | -3.63    | 3.79       | 123.29    | -0.96          | .34             |
| Group × Posttreatment                         | -0.44    | 3.78       | 123.35    | -0.12          | .91             |
| Dyad × Maintenance                            | -5.22    | 3.79       | 123.29    | -1.38          | .17             |
| Group × Maintenance                           | 2.40     | 3.74       | 123.29    | 0.64           | .52             |

| <b>Number of Relevant Utterances</b> |        |       |        |       |        |
|--------------------------------------|--------|-------|--------|-------|--------|
| (Intercept)                          | 4.00   | 0.96  | 65.85  | 4.15  | < .001 |
| Dyad                                 | 1.29   | 1.05  | 66.84  | 1.23  | .22    |
| Large Group                          | -0.83  | 1.04  | 66.60  | -0.80 | .43    |
| Posttreatment                        | 0.19   | 0.29  | 120.35 | 0.66  | .51    |
| Maintenance                          | 0.11   | 0.29  | 120.35 | 0.39  | .70    |
| Temple                               | 1.93   | 0.85  | 78.02  | 2.28  | .03    |
| Adler                                | -1.43  | 1.03  | 61.37  | -1.39 | .17    |
| Dyad × Posttreatment                 | 0.14   | 0.42  | 120.35 | 0.33  | .74    |
| Group × Posttreatment                | -0.10  | 0.42  | 120.40 | -0.24 | .81    |
| Dyad × Maintenance                   | -0.19  | 0.42  | 120.35 | -0.46 | .65    |
| Group × Maintenance                  | 0.35   | 0.41  | 120.35 | 0.85  | .40    |
| <b>Percent Relevant Utterances</b>   |        |       |        |       |        |
| (Intercept)                          | 40.43  | 8.81  | 63.02  | 4.59  | < .001 |
| Dyad                                 | 19.52  | 9.57  | 63.76  | 2.04  | .05    |
| Large Group                          | -12.97 | 9.48  | 63.55  | -1.37 | .18    |
| Posttreatment                        | -1.78  | 2.49  | 118.46 | -0.72 | .48    |
| Maintenance                          | 0.55   | 2.49  | 118.46 | 0.22  | .82    |
| Temple                               | 34.79  | 7.70  | 74.30  | 4.52  | .00    |
| Adler                                | -7.86  | 9.43  | 59.19  | -0.83 | .41    |
| Dyad × Posttreatment                 | 5.06   | 3.56  | 118.46 | 1.42  | .16    |
| Group × Posttreatment                | 1.57   | 3.55  | 118.50 | 0.44  | .66    |
| Dyad × Maintenance                   | -0.76  | 3.56  | 118.46 | -0.21 | .83    |
| Group × Maintenance                  | 0.62   | 3.52  | 118.46 | 0.18  | .86    |
| <b>Number of Complete Utterances</b> |        |       |        |       |        |
| (Intercept)                          | 3.17   | 1.02  | 64.78  | 3.12  | < .001 |
| Dyad                                 | 1.66   | 1.10  | 65.32  | 1.50  | .14    |
| Large Group                          | -0.95  | 1.09  | 65.13  | -0.87 | .39    |
| Posttreatment                        | 0.15   | 0.26  | 121.21 | 0.59  | .56    |
| Maintenance                          | 0.19   | 0.26  | 121.21 | 0.72  | .47    |
| Temple                               | 2.18   | 0.88  | 75.21  | 2.48  | .02    |
| Adler                                | -1.29  | 1.09  | 61.48  | -1.18 | .24    |
| Dyad × Posttreatment                 | -0.08  | 0.38  | 121.21 | -0.22 | .83    |
| Group × Posttreatment                | -0.17  | 0.38  | 121.24 | -0.44 | .66    |
| Dyad × Maintenance                   | -0.61  | 0.38  | 121.21 | -1.61 | .11    |
| Group × Maintenance                  | 0.35   | 0.37  | 121.21 | 0.95  | .34    |
| <b>Percent Complete Utterances</b>   |        |       |        |       |        |
| (Intercept)                          | 29.51  | 9.40  | 62.52  | 3.14  | < .001 |
| Dyad                                 | 25.42  | 10.20 | 62.77  | 2.49  | .02    |

|                       |        |       |        |       |     |
|-----------------------|--------|-------|--------|-------|-----|
| Large Group           | -14.22 | 10.11 | 62.63  | -1.41 | .16 |
| Posttreatment         | -2.74  | 2.04  | 120.78 | -1.35 | .18 |
| Maintenance           | 1.23   | 2.04  | 120.78 | 0.60  | .55 |
| Temple                | 37.07  | 8.06  | 70.63  | 4.60  | .00 |
| Adler                 | -9.15  | 10.13 | 60.26  | -0.90 | .37 |
| Dyad × Posttreatment  | 1.25   | 2.91  | 120.78 | 0.43  | .67 |
| Group × Posttreatment | 2.68   | 2.90  | 120.80 | 0.92  | .36 |
| Dyad × Maintenance    | -5.69  | 2.91  | 120.78 | -1.95 | .05 |
| Group × Maintenance   | 1.22   | 2.88  | 120.78 | 0.43  | .67 |

*Note.* In all omnibus analyses, the reference factors are (1) Control condition (2) Pretreatment and (3) Boston University. "Group" refers to the large group condition.
