# Supplementary material
Source: publisher figshare collection journal article supplement (https://asha.figshare.com/articles/dataset/_/28719578)
Supplement: Supplementary file 11 [file 1]

**Supplemental Material S10.** Results of linear mixed-effect models for linguistic measures: Comprehensive Aphasia Test and Verb Naming Test.

|                                                  | Estimate | Std. Error | <i>df</i> | <i>t</i> value | <i>p</i> -value |
|--------------------------------------------------|----------|------------|-----------|----------------|-----------------|
| <b>CAT Naming Total Score</b>                    |          |            |           |                |                 |
| (Intercept)                                      | 23.14    | 7.32       | 71.18     | 3.16           | < .01           |
| Condition-Control                                | 9.38     | 6.14       | 73.6      | 1.53           | .13             |
| Time-Posttreatment                               | 3.50     | 1.15       | 139.1     | 3.03           | < .01           |
| Time-Maintenance                                 | 2.11     | 1.18       | 139.1     | 1.80           | .07             |
| Site-Temple                                      | 22.75    | 8.11       | 70.04     | 2.81           | < .01           |
| Site-Adler                                       | 23.48    | 8.43       | 70.03     | 3.14           | < .01           |
| Control × Post-Tx                                | -3.86    | 1.68       | 139.17    | -2.30          | .02             |
| Control × Maintenance                            | -2.93    | 1.69       | 139.20    | -1.73          | .09             |
| <b>CAT Repetition Total Score</b>                |          |            |           |                |                 |
| (Intercept)                                      | 31.03    | 5.50       | 71.71     | 5.65           | < .0001         |
| Condition-Control                                | 8.44     | 4.63       | 75.30     | 1.82           | .07             |
| Time-Posttreatment                               | 3.90     | 1.05       | 139.08    | 3.70           | < .001          |
| Time-Maintenance                                 | 3.32     | 1.07       | 139.18    | 3.10           | < .001          |
| Site-Temple                                      | 14.83    | 6.08       | 70.02     | 2.44           | .02             |
| Site-Adler                                       | 12.41    | 6.32       | 69.97     | 1.96           | .05             |
| Control × Post-Tx                                | -3.98    | 1.53       | 139.22    | -2.61          | .01             |
| Control × Maintenance                            | -2.52    | 1.54       | 139.27    | -1.64          | .10             |
| <b>CAT Picture Description Narrative Scoring</b> |          |            |           |                |                 |
| (Intercept)                                      | 4.27     | 3.89       | 75.76     | 1.10           | .28             |
| Condition-Control                                | 2.65     | 3.37       | 88.43     | 0.79           | .43             |
| Time-Posttreatment                               | 1.53     | 1.37       | 138.11    | 1.12           | .27             |
| Time-Maintenance                                 | 0.21     | 1.39       | 138.44    | 0.15           | .88             |
| Site-Temple                                      | 13.19    | 4.24       | 69.89     | 3.11           | < .01           |
| Site-Adler                                       | 17.20    | 4.41       | 69.7      | 3.90           | < .001          |
| Control × Post-Tx                                | -0.42    | 2.00       | 138.6     | -0.212         | .83             |
| Control × Maintenance                            | 1.83     | 2.00       | 138.68    | 0.91           | .36             |
| <b>Verb Naming Test Number Correct</b>           |          |            |           |                |                 |
| (Intercept)                                      | 5.79     | 1.96       | 72.71     | 2.96           | < .01           |
| Condition-Control                                | 3.19     | 1.66       | 78.47     | 1.93           | .058            |
| Time-Posttreatment                               | 1.43     | 0.47       | 138.16    | 3.04           | < .01           |
| Time-Maintenance                                 | 0.71     | 0.48       | 138.33    | 1.48           | .14             |
| Site-Temple                                      | 6.43     | 2.15       | 69.97     | 2.99           | < .01           |
| Site-Adler                                       | 7.41     | 2.24       | 69.93     | 3.31           | < .01           |
| Control × Post-Tx                                | -1.23    | 0.68       | 138.33    | -1.81          | .07             |

|                       |       |      |        |       |     |
|-----------------------|-------|------|--------|-------|-----|
| Control × Maintenance | -0.57 | 0.69 | 138.41 | -0.83 | .41 |
|-----------------------|-------|------|--------|-------|-----|

*Note.* In these post-hoc (secondary) analyses, the reference factors are (1) Dyad Condition (2) Pretreatment and (3) Boston University. "Condition" refers to the dyad condition and "Post-Tx" refers to posttreatment.
