# Supplementary material
Source: publisher figshare collection journal article supplement (https://asha.figshare.com/articles/dataset/_/28719578)
Supplement: Supplementary file 12 [file 1]

**Supplemental Material S1.** Results of linear mixed-effect models for functional and patient-reported outcome measures.

|                                                        | Estimate | Std. Error | <i>df</i> | <i>t</i> value | <i>p</i> -value |
|--------------------------------------------------------|----------|------------|-----------|----------------|-----------------|
| <b>Aphasia Communication Outcome Measure</b>           |          |            |           |                |                 |
| (Intercept)                                            | 53.95    | 2.27       | 131.29    | 23.80          | < .001          |
| Condition-Dyad                                         | -2.15    | 2.23       | 162.52    | -0.97          | .34             |
| Condition-Large Group                                  | -4.47    | 2.24       | 162.54    | -2.00          | .05             |
| Time-Posttreatment                                     | 0.18     | 1.29       | 206.23    | 0.14           | .89             |
| Time-Maintenance                                       | 2.30     | 1.27       | 205.73    | 1.81           | .07             |
| Site-Temple                                            | 0.18     | 2.16       | 106.72    | 0.08           | .94             |
| Site-Adler                                             | -1.68    | 2.24       | 106.35    | -0.75          | .46             |
| Dyad × Posttreatment                                   | 1.40     | 1.77       | 205.07    | 0.79           | .43             |
| Group × Posttreatment                                  | 3.39     | 1.82       | 207.27    | 1.86           | .06             |
| Dyad × Maintenance                                     | 0.28     | 1.78       | 205.23    | 0.16           | .87             |
| Group × Maintenance                                    | 2.45     | 1.81       | 207.01    | 1.35           | .18             |
| <b>Communication Activities of Daily Living-3</b>      |          |            |           |                |                 |
| (Intercept)                                            | 74.53    | 4.26       | 64.23     | 17.48          | < .001          |
| Dyad                                                   | -7.43    | 4.72       | 66.91     | -1.57          | .12             |
| Large Group                                            | -3.98    | 4.72       | 66.91     | -0.84          | .40             |
| Posttreatment                                          | -1.19    | 1.36       | 122.99    | -0.88          | .38             |
| Maintenance                                            | 1.19     | 1.36       | 122.99    | 0.88           | .38             |
| Temple                                                 | 14.68    | 4.39       | 60.00     | 3.34           | .00             |
| Adler                                                  | 13.76    | 4.74       | 60.00     | 2.91           | .01             |
| Dyad × Posttreatment                                   | 3.28     | 1.90       | 122.99    | 1.73           | .09             |
| Group × Posttreatment                                  | 3.23     | 1.92       | 123.05    | 1.68           | .10             |
| Dyad × Maintenance                                     | 1.95     | 1.90       | 122.99    | 1.02           | .31             |
| Group × Maintenance                                    | 2.72     | 1.90       | 122.99    | 1.43           | .16             |
| <b>Assessment of Living with Aphasia-Wall Question</b> |          |            |           |                |                 |
| (Intercept)                                            | 2.98     | 0.24       | 91.16     | 12.54          | < .001          |
| Dyad                                                   | -0.04    | 0.28       | 110.14    | -0.16          | .87             |
| Large Group                                            | -0.34    | 0.28       | 110.14    | -1.23          | .22             |
| Posttreatment                                          | 0.08     | 0.18       | 122.93    | 0.45           | .65             |
| Maintenance                                            | 0.07     | 0.18       | 122.93    | 0.39           | .70             |
| Temple                                                 | -0.20    | 0.22       | 59.98     | -0.88          | .38             |
| Adler                                                  | -0.15    | 0.24       | 59.95     | -0.64          | .52             |
| Dyad × Posttreatment                                   | -0.12    | 0.26       | 122.93    | -0.46          | .65             |
| Group × Posttreatment                                  | -0.04    | 0.26       | 123.28    | -0.14          | .89             |
| Dyad × Maintenance                                     | 0.05     | 0.26       | 122.93    | 0.21           | .84             |

|                                                                  |       |      |        |       |        |
|------------------------------------------------------------------|-------|------|--------|-------|--------|
| Group × Maintenance                                              | 0.02  | 0.26 | 122.93 | 0.08  | .94    |
| <b>Communication Confidence Rating Scale for Aphasia (CCRSA)</b> |       |      |        |       |        |
| (Intercept)                                                      | 31.98 | 1.41 | 76.75  | 22.73 | < .001 |
| Dyad                                                             | -1.82 | 1.60 | 87.43  | -1.14 | .26    |
| Large Group                                                      | -3.77 | 1.60 | 87.43  | -2.36 | .02    |
| Posttreatment                                                    | 0.62  | 0.85 | 122.94 | 0.73  | .47    |
| Maintenance                                                      | 1.76  | 0.85 | 122.94 | 2.08  | .04    |
| Temple                                                           | -0.04 | 1.38 | 59.97  | -0.03 | .98    |
| Adler                                                            | -1.06 | 1.49 | 59.95  | -0.71 | .48    |
| Dyad × Posttreatment                                             | 0.43  | 1.18 | 122.94 | 0.36  | .72    |
| Group × Posttreatment                                            | -0.90 | 1.19 | 123.15 | -0.75 | .45    |
| Dyad × Maintenance                                               | -0.03 | 1.18 | 122.94 | -0.03 | .98    |
| Group × Maintenance                                              | -0.19 | 1.18 | 122.94 | -0.16 | .87    |
| <b>MOS Social Support Scale Total Score</b>                      |       |      |        |       |        |
| (Intercept)                                                      | 73.48 | 4.04 | 79.07  | 18.17 | < .001 |
| Dyad                                                             | 3.21  | 4.61 | 91.28  | 0.70  | .49    |
| Large Group                                                      | -3.43 | 4.61 | 91.28  | -0.74 | .46    |
| Posttreatment                                                    | 1.38  | 2.58 | 121.81 | 0.53  | .59    |
| Maintenance                                                      | 3.02  | 2.58 | 121.81 | 1.17  | .24    |
| Temple                                                           | -5.10 | 3.94 | 59.88  | -1.29 | .20    |
| Adler                                                            | -0.04 | 4.25 | 59.70  | -0.01 | .99    |
| Dyad × Posttreatment                                             | -0.23 | 3.64 | 122.04 | -0.06 | .95    |
| Group × Posttreatment                                            | -1.70 | 3.64 | 122.04 | -0.47 | .64    |
| Dyad × Maintenance                                               | 1.48  | 3.61 | 121.81 | 0.41  | .68    |
| Group × Maintenance                                              | 0.48  | 3.61 | 121.81 | 0.13  | .90    |

*Note.* In all omnibus analyses, the reference factors are (1) Control condition (2) Pretreatment and (3) Boston University. "Group" refers to the large group condition.
